# Supplementary material
Source: publisher site journal article supplement (https://www.dovepress.com/article/281135)
Supplement: Supplementary file 1 [file get_supplementary_file.php]

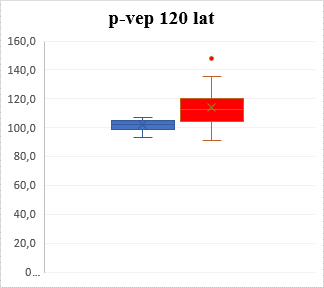

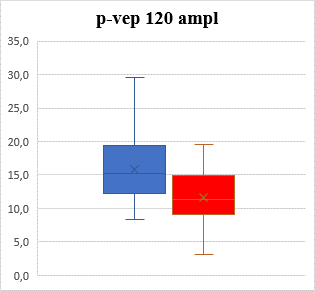

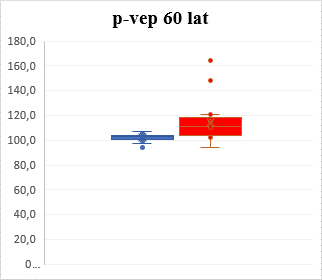

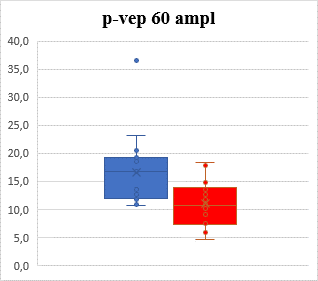

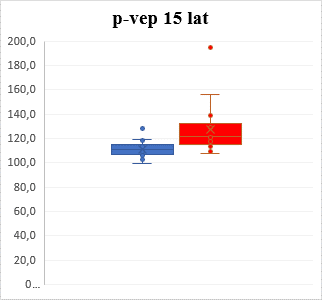

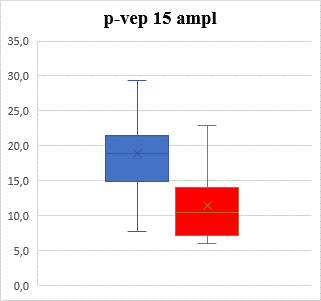


**Supplementary Figure S1:** box plot showing the distribution of the results for both the control group (CG) and the Gorlin Goltz syndrome (GGS) group. CG is represented in blue, GGS group is represented in red. Lat: latency, ampl: amplitude. Latency is expressed in milliseconds, amplitude in microvolts.
